# Supplementary material for: Characterization of Human Mesenchymal Stem Cells from Ewing Sarcoma Patients. Pathogenetic Implications
Source: PLoS One. 2014 Feb 3;9(2):e85814. doi: 10.1371/journal.pone.0085814 (PMC3911896; doi:10.1371/journal.pone.0085814)
Supplement: File S1 — Tables S1 and S2. Table S1. Mab antibodies used in the multiparametric analysis and functional assays. Table S2. Percentage of Cells evaluated for each cell surface marker. (DOC) [file pone.0085814.s002.doc]

**File S1**

**Supporting Information**

**Supplementary Material and Methods**

**MSC samples description**

BM-MSC-P (n=11) were provided by LUMC (Leiden University Medical Centre, The Netherlands), whereas BM-MSC-HD (n=6) were provided by the HUSAL (University Hospital of Salamanca, Spain). In addition, MSC derived from other sources were also considered. MSC derived from adipose tissue (n=4) from IOR (Istituto Ortopedico Rizzoli, Bologna, Italy) and HUSAL, Placenta derived MSC (n=3) from HUSAL, dental pulp(n=3) amniotic membrane (n=3) and chorion membrane (n=3) from the University of Bologna (Bologna, Italy) were isolated and expanded as previously described (18-22).The ethical committee of the Rizzoli Institute, LUMC and HUSAL approved the studies, and informed consent was obtained from all subjects involved.In the first approach, MSC from low passages, between 1 and 4, were fully characterized at the immunophenotypic level. These include MSC from EWS-P(n=11); MSC-HD (n=6); MSC derived from adipose tissue (n=1) and MSC derived from placenta (n=1). In the second approach, including MSC from higher passages (n=14), these were used only for CD99 detection, due to the determinant number of cells necessary to perform the full study.

**Differentiation Assays**

Briefly, regarding osteogenic differentiation, cells were cultured in Alpha-MEM (Invitrogen) supplemented with 10% FBS; 1% P/S; 0,1μM Dexamethasone (Sigma Aldrich); 10mM Glycerol-2-Phosphate (Sigma) and 50μM 2-Phospho-L-Ascorbic-Acid (Biochemika) and later on stained for alkaline phosphatase activity detected with BT-BCIP and for calcium deposits with Alizarin Red. Adipogenic differentiation was evaluated after incubation in Alpha-MEM (Gibco) medium supplemented with 10%FBS; 0,1μM Dexamethasone (Sigma); 50μg/ml Human Insulin (Sigma); 0,5mM Isobutylmethylxantine (Sigma) and 60μM Indomethacin (Biochemika). Lipid drop formation was evaluated with Oil Red staining. To induce chondrogenic differentiation, aliquots of 2.5x105 cells were pelleted in polypropylene conical tubes in 0.5 ml of differentiation medium as previously described (16). Pellets were formalin-fixed, embedded in paraffin, examined morphologically and immunostained for Type II collagen (Chemicon Int, Tamecula, CA).

**Supplementary Figure captures and Tables**

**Table S1. Mab antibodies used in the multiparametric analysis and functional assays.**

**Table S2. Percentage of Cells evaluated for each cell surface marker**

**Figure 1S. MFI of markers CD90, CD105, CD34 and CD45 in MSC-HD, MSC-P and EWS cell lines.**

Table S1

| **Antibody** | **Dilution** | **Commercial Source** |
| --- | --- | --- |
| CD90-AF700 | 1:100 | Biolegend |
| CD45-AmCyan | 4:100 | Becton Dickinson, BioSciences |
| CD34-PerCP | 10:100 | Becton Dickinson |
| CD105-PB | 4:100 | Exbio |
| CD99-PE | 10:100 | BD Pharmingen |
| CD166-PE | 10:100 | Beckman Coulter |
| CD271-PE | 10:100 | Becton Dickinson |
| CD54-FITC | 10:100 | ExBio |
| CD106-FITC | 10:100 | BD Pharmingen |
| CD19-FITC | 10:100 | Becton Dickinson |
| CD117-APC | 3:100 | Becton Dickinson |
| CD73-APC | 3:100 | eBioscience |
| HLA DR-APC | 3:100 | Becton Dickinson |
| CD14-PeCy7 | 5:100 | Becton Dickinson |
| CD13-PeCy7 | 5:100 | Becton Dickinson |
| CD10-PeCy7 | 5:100 | Becton Dickinson |
| CD99 | 1:80 | Covance, Princeton,NJ |

**Table S2**

| **Ewing Sarcoma Cell Lines** | | | | | | | | | | | | | | | | | | |
| --- | --- | --- | --- | --- | --- | --- | --- | --- | --- | --- | --- | --- | --- | --- | --- | --- | --- | --- |
|  | **A4573** | | **A673** | | **CADO-ES** | | **RD-ES** | | **RM-82** | | **STAET10** | | **STAET1** | | **STAET2.1** | | **TC71** | |
| % | +/- | % | +/- | % | +/- | % | +/- | % | +/- | % | +/- | % | +/- | % | +/- | % | +/- |
| CD19 | 0% | - | 0% | - | 0% | - | 0% | - | 0% | - | 0% | - | 0% | - | 0% | - | 0% | - |
| CD271 | 100% | ++ | 100% | ++ | 100% | ++ | 100% | ++ | 100% | ++ | 100% | ++ | 100% | ++ | 100% | + | 100% | + |
| CD34 | 0% | - | 0% | - | 0% | - | 0% | - | 0% | - | 0% | - | 0% | - | 0% | - | 0% | - |
| CD10 | 0% | - | 0% | - | 0% | - | 0% | - | 0% | - | 0% | -- | 0% | - | 0% | - | 0% | - |
| HLA-DR | 0% | - | 0% | - | 0% | - | 0% | - | 0% | - | 0% | - | 0% | - | 0% | - | 0% | - |
| CD90 | 100% | ++ | 100% | ++ | 100% | ++ | 100% | ++ | 100% | ++ | 100% | ++ | 100% | ++ | 100% | ++ | 28% | -/+ |
| CD105 | 100% | + | 100% | + | 100% | + | 100% | + | 100% | + | 100% | + | 100% | + | 100% | + | 100% | + |
| CD45 | 0% | - | 0% | - | 0% | - | 0% | - | 0% | - | 0% | - | 0% | - | 0% | - | 0% | - |
| CD106 | 0% |  | 0% | - | 0% | - | 0% | - | 0% | - | 0% | - | 0% | - | 0% | - | 0% | - |
| CD166 | 100% | ++ | 100% | ++ | 0% | - | 100% | ++ | 100% | ++ | 100% | ++ | 100% | ++ | 100% | + | 100% | + |
| CD13 | 0% | - | 0% | - | 0% | - | 30% | -/+ | 0% | - | 0% | - | 0% | - | 0% | - | 0% | - |
| CD73 | 0% | - | 100% | + | 0% | - | 56% | -/+ | 0% | - | 0% | - | 0% | - | 0% | - | 100% | + |
| CD54 | 0% | - | 0% | - | 0% | - | 100% | ++ | 0% | - | 0% | - | 100% | + | 0% | - | 0% | - |
| CD99 | 100% | ++ | 100% | +++ | 100% | +++ | 100% | + | 100% | +++ | 100% | +++ | 100% | ++ | 100% | ++ | 100% | ++ |
| CD14 | 80% | + | 88% | + | 100% | + | 0% | - | 0% | - | 0% | - | 0% | - | 0% | - | 0% | - |
| CD117 | 100% | + | 0% | - | 100% | + | 38% | -/+ | 100% | ++ | 100% | + | 100% | + | 100% | + | 0% | - |
